# Supplementary material for: Aneuploid proliferation defects in yeast are not driven by copy number changes of a few dosage-sensitive genes
Source: PubMed Central journal article supplement — Genes Dev. 2015 May 1;29(9):898–903. doi: 10.1101/gad.261743.115 (PMC4421978; doi:10.1101/gad.261743.115), 2015-05-01

## Bonney\_Supp Figure 4

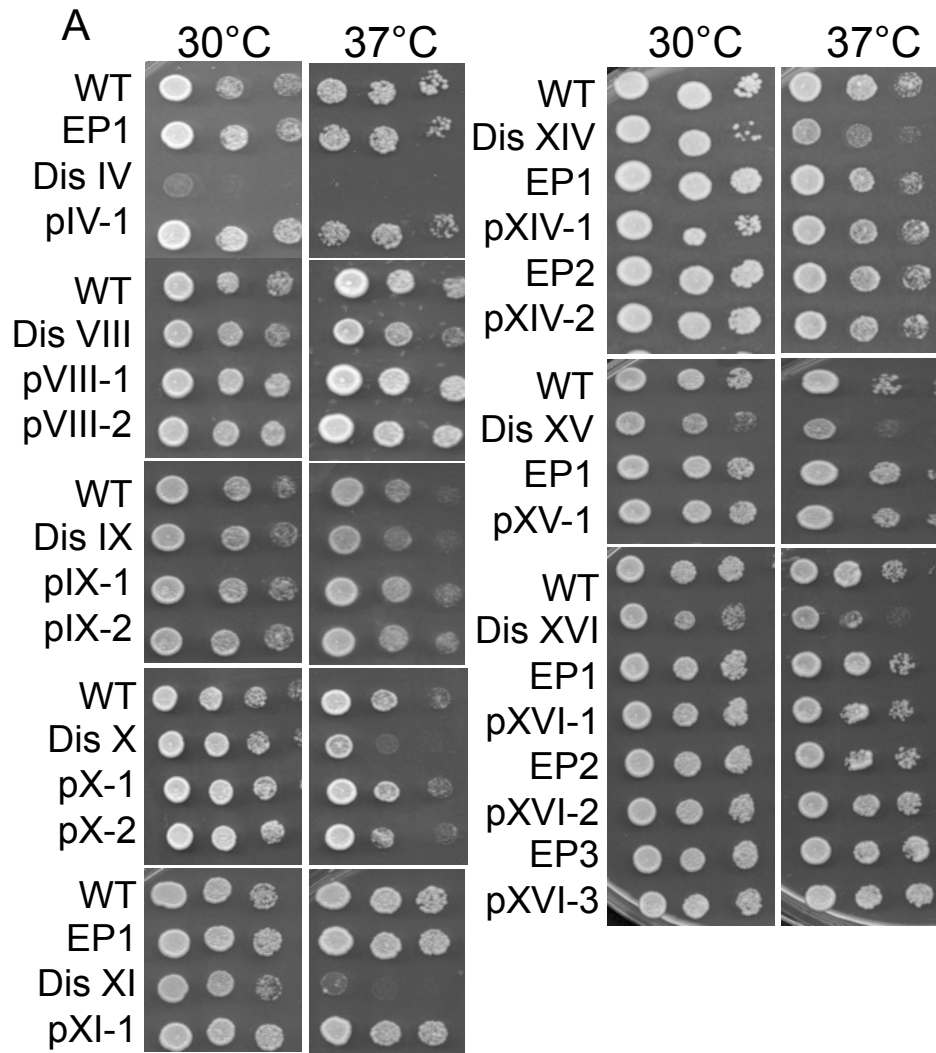

**Supplemental Figure 4.** An extra copy of DSGs does not cause sensitivity to high temperature, cycloheximide or phleomycin. Wild-type strains, disomic strains or wild-type strains carrying the indicated plasmids were spotted as 10 fold serial dilutions on YEPD plates at 37°C (A) or on YEPD plates containing 0.05 µg/ml cycloheximide (B) or 0.3 µg/ml phleomycin (C) at 30°C. Strains are in the following order with plasmid described in brackets:

(A) A22361, A36950 (EP1), A24367, A36926 (pIV-1), A22361, A27036, A36928 (pVIII-1), A36929 (pVIII-2), A22361, A13975, A36931 (pIX-1), A36932 (pIX-2), A22361, A27093, A36934 (pX-1), A36935 (pX-2), A22361, A36950 (EP1), A28266, A36937 (pXI-1), A22361, A28344, A36950 (EP1), A36940 (pXIV-1), A36951 (EP2), A36941 (pXIV-2), A22361, A27930, A36950 (EP1), A36943 (pXV-1), A22361, A34149, A36950 (EP1), A36944 (pXVI-1), A36951 (EP2), A36945 (pXVI-2), A36952 (EP3), A36946 (pXVI-3)

(B) A22361, A12683, A36950 (EP1), A36920 (pI-1), A36952 (EP3), A36921 (pI-2), A36954 (EP1+EP3), A36922 (pI-1+pI-2), A22361, A12685, A36950 (EP1), A36923 (pII-1), A36952 (EP3), A36924 (pII-2), A36925 (pII-1 + pII-2), A36950 (EP1), A24367, A36926 (pIV-1), A22361, A28265, A36950 (EP1), A36927 (pV-1), A22361, A27036, A36928 (pVIII-1), A36929 (pVIII-2), A22361, A13975, A36950 (EP1), A36931 (pIX-1), A36952 (EP3), A36932 (pIX-2), A22361, A27093, A36951 (EP2), A36934 (pX-1), A36950 (EP1), A36935 (pX-2), A36936 (pX-1+pX-2), A22361, A28266, A36950 (EP1), A36937 (pXI-1), A22361, A28344, A36950 (EP1), A36940 (pXIV-1), A36951 (EP2), A36941 (pXIV-2), A36953 (EP1+EP2), A36942 (pXIV-1+pXIV-2), A22361, A34149, A36953 (EP1+EP2), A36947 (pXIV-1+pXVI-2)

(C) A22361, A36950 (EP1), A28265, A36927 (pV-1), A27036, A36928 (pVIII-1), A22361, A36950 (EP1), A28266, A36937 (pXI-1), A36937 (pXI-1), A27930, A36943 (pXV-1)

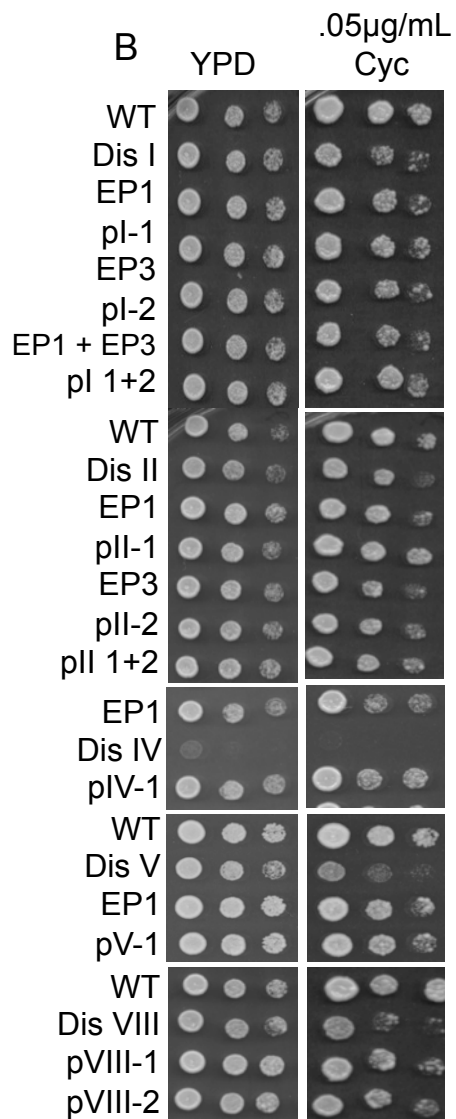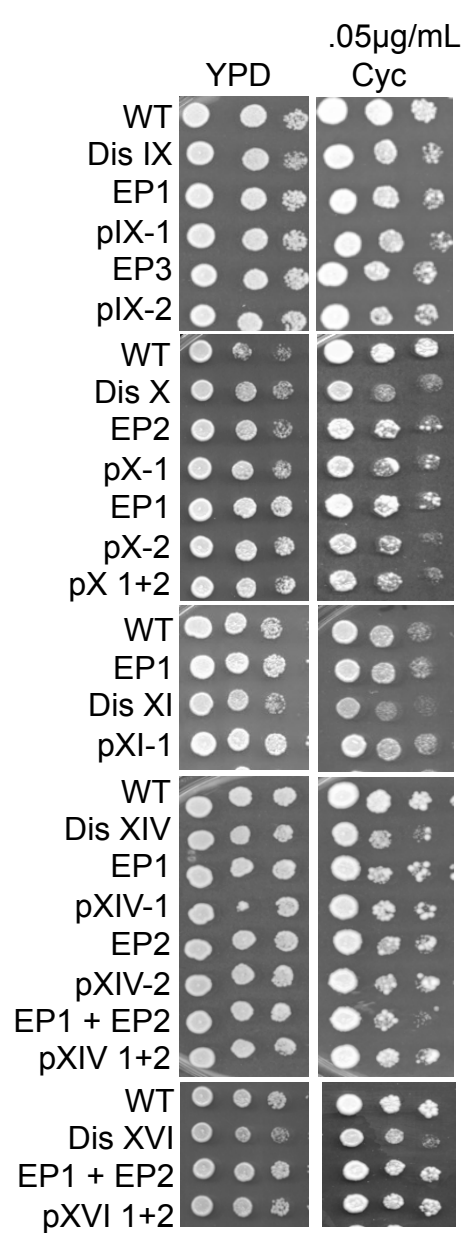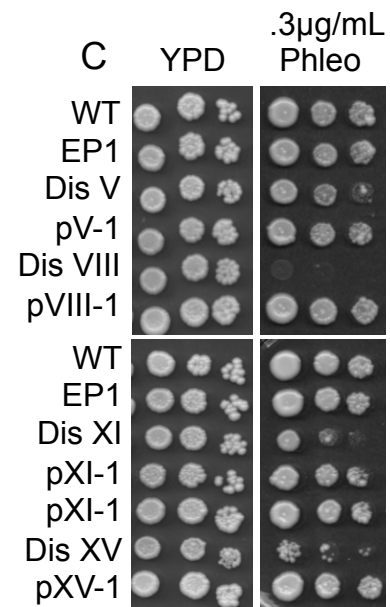

Supplement: supp_29.9.898_Supp_Fig_4.pdf [file supp_29.9.898_Supp_Fig_4.pdf]
