# Supplementary material for: Aneuploid proliferation defects in yeast are not driven by copy number changes of a few dosage-sensitive genes
Source: PubMed Central journal article supplement — Genes Dev. 2015 May 1;29(9):898–903. doi: 10.1101/gad.261743.115 (PMC4421978; doi:10.1101/gad.261743.115), 2015-05-01
Supplement: supp_29.9.898_SuppTable_1.pdf [file supp_29.9.898_SuppTable_1.pdf]

**Supplemental Table 1:** Plasmids used in this study

| Plasmid | Chrom | Name   | Vector             | Genes                           |
|---------|-------|--------|--------------------|---------------------------------|
| A2495   | I     | I-1    | Ycplac22           | <i>MYO4</i>                     |
| A2496   |       | I-2    | Ycplac111          | <i>FUN30, PMT2</i>              |
| A2497   | II    | II-1   | Ycplac22           | <i>APE3, OM14, PET9, TEF2</i>   |
| A2498   |       | II-2   | Ycplac111          | <i>KAP104, SHE1, UBC4</i>       |
| A2536   |       | II-3   | pRS313             | <i>SCO2, AMN1, PBP2</i>         |
| A2499   | IV    | IV-1   | Ycplac22           | <i>ARF1, SAC6</i>               |
| A2500   | V     | V-1    | Ycplac22           | <i>GLN3</i>                     |
| A2501   | VIII  | VIII-1 | Ycplac22           | <i>MYO1, OPI1, STE12</i>        |
| A2502   |       | VIII-2 | pRS313             | <i>DMA1, SFB3</i>               |
| A2503   | IX    | IX-1   | Ycplac22           | <i>PRK1</i>                     |
| A2504   |       | IX-2   | Ycplac111          | <i>AXL2, TED1</i>               |
| A2505   | X     | X-1    | pRS313             | <i>TPK1</i>                     |
| A2506   |       | X-2    | Ycplac22           | <i>BFA1, HSP150, IRC8, KAR2</i> |
| A2507   | XI    | XI-1   | Ycplac22           | <i>SPC42, TPK3</i>              |
| A2508   |       | XI-2   | pRS313             | <i>SDS22</i>                    |
| A2509   | XIV   | XIV-1  | Ycplac22           | <i>MKS1, POR1, TOM70</i>        |
| A2510   |       | XIV-2  | pRS313             | <i>KSH1, PUB1, SSN8</i>         |
| A2511   | XV    | XV-1   | Ycplac22           | <i>EFT1, RPS12, SLG1</i>        |
| A2512   | XVI   | XVI-1  | Ycplac22           | <i>KES1, PEP4</i>               |
| A2513   |       | XVI-2  | pRS313             | <i>HAA1, TPK2</i>               |
| A2514   |       | XVI-3  | Ycplac111          | <i>TEF1, VPS4</i>               |
| A2515   | VI    | pACT1  | MoBY <sup>23</sup> | <i>ACT1</i>                     |
