# Supplementary material for: Aneuploid proliferation defects in yeast are not driven by copy number changes of a few dosage-sensitive genes
Source: PubMed Central journal article supplement — Genes Dev. 2015 May 1;29(9):898–903. doi: 10.1101/gad.261743.115 (PMC4421978; doi:10.1101/gad.261743.115), 2015-05-01
Supplement: supp_29.9.898_SuppTable_2.pdf [file supp_29.9.898_SuppTable_2.pdf]

**Supplemental Table 2:** Strains used in this study

| Strain Number | Disome | Relevant Genotype                                                                                                                                                                                                |
|---------------|--------|------------------------------------------------------------------------------------------------------------------------------------------------------------------------------------------------------------------|
| A2587         | -      | MATa, ade2-1, leu2-3, ura3, trp1-1, his3-11,15, can1-100, GAL, psi+                                                                                                                                              |
| A22361        | -      | MATa, ade1::HIS3, lys2::KanMX6                                                                                                                                                                                   |
| A12683        | I      | MATa, ade1::HIS3, ade1::KanMX6                                                                                                                                                                                   |
| A12685        | II     | MATa, lys2::HIS3, lys2::KanMX6                                                                                                                                                                                   |
| A24367        | IV     | MATa, trp1::HIS3, trp1::KanMX6                                                                                                                                                                                   |
| A28265        | V      | MATa, can1::HIS3, intergenic region (187520-187620) between YER015W and YER016W::KanMX6                                                                                                                          |
| A27036        | VIII   | MATa, intergenic region (119778-119573) between YHR006W and YHR007C::HIS3, intergenic region (119778-119573) between YHR006W and YHR007C::KanMX6                                                                 |
| A13975        | IX     | MATa, intergenic region (430900-431000) between YKL006C-A and YKL006W::HIS3, intergenic region (430900-431000) between YKL006C-A and YKL006W::KanMX6                                                             |
| A27093        | X      | MATa, intergenic region (322250-322350) between YJL061W and YJL060W::HIS3, intergenic region (322250-322350) between YJL061W and YJL060W::KanMX6                                                                 |
| A28266        | XI     | MATa, intergenic region (430900-431000) between YKL006C-A and YKL006W::HIS3, intergenic region (430900-431000) between YKL006C-A and YKL006W::KanMX6                                                             |
| A28344        | XIV    | MATa, intergenic region (622880-622980) between YNL005C and YNL004W::HIS3, intergenic region (622880-622980) between YNL005C and YNL004W::KanMX6                                                                 |
| A27930        | XV     | MATa, leu9::HIS3, leu9::KanMX6                                                                                                                                                                                   |
| A34149        | XVI    | MATa, met12::HIS3, met12::KanMX6                                                                                                                                                                                 |
| A36219        | IX     | MATa, intergenic region (430900-431000) between YKL006C-A and YKL006W::HIS3, intergenic region (430900-431000) between YKL006C-A and YKL006W::KanMX6, PGK1::PGK1-GFP-URA, intergenic region (138257-138701)::Nat |
| A36222        | XI     | MATa, intergenic region (430900-431000) between YKL006C-A and YKL006W::HIS3, intergenic region (430900-431000) between YKL006C-A and YKL006W::KanMX6, PGK1::PGK1-GFP-URA, intergenic region (92013-92521)::Nat   |
| A36215        | IX     | MATa, intergenic region (430900-431000) between YKL006C-A and YKL006W::HIS3, intergenic region (430900-431000) between YKL006C-A and YKL006W::KanMX6, GVP36::Nat, TED1::URA3                                     |
| A36233        | IX     | MATa, intergenic region (430900-431000) between YKL006C-A and YKL006W::HIS3, intergenic region (430900-431000) between YKL006C-A and YKL006W::KanMX6, AXL2::URA3,                                                |

|                |     |                                                                                                                                                                                                     |
|----------------|-----|-----------------------------------------------------------------------------------------------------------------------------------------------------------------------------------------------------|
|                |     | PRK1::Nat                                                                                                                                                                                           |
| A36069         | IX  | MATa, intergenic region (430900-431000) between YKL006C-A and YKL006W::HIS3, intergenic region (430900-431000) between YKL006C-A and YKL006W::KanMX6, GVP36::Nat, AXL2::URA3, PRK1::Nat, TED1::URA3 |
| A36336         | XI  | MATa, ade2-1, leu2-3, ura3, trp1-1, his3-11,15, can1-100, GAL, psi+, xxx::KAN, xxx::HIS3, SPC42::NAT, YPT52::URA3                                                                                   |
| A36919         | XI  | MATalpha, ade2-1, leu2-3, ura3, trp1-1, his3-11,15, can1-100, GAL, psi+, xxx::KAN, xxx::HIS3, SDS22::NAT, TPK3::URA                                                                                 |
| A36918         | XI  | MATa, ade2-1, leu2-3, ura3, trp1-1, his3-11,15, can1-100, GAL, psi+, xxx::KAN, xxx::HIS3, SDS22::NAT, YPT52::URA3, TPK3::URA                                                                        |
| A36470         | V   | MATa, can1::HIS3, intergenic region (187520-187620) between YER015W and YER016W::KanMX6, GLN3::Nat                                                                                                  |
| A36585         | XVI | MATa, intergenic region (622880-622980) between YNL005C and YNL004W::HIS3, intergenic region (622880-622980) between YNL005C and YNL004W::KanMX6, TEF1::Nat, VPS4::TRP1                             |
| A36650         | XVI | MATalpha, intergenic region (622880-622980) between YNL005C and YNL004W::HIS3, intergenic region (622880-622980) between YNL005C and YNL004W::KanMX6, TEF1::Nat, TPK2::TRP1                         |
| A36689         | XVI | MATalpha, intergenic region (622880-622980) between YNL005C and YNL004W::HIS3, intergenic region (622880-622980) between YNL005C and YNL004W::KanMX6, TPK2::TRP1, KES1::Nat                         |
| A36859, A36860 | XVI | MATa, intergenic region (622880-622980) between YNL005C and YNL004W::HIS3, intergenic region (622880-622980) between YNL005C and YNL004W::KanMX6, TEF1::Nat, TPK2::TRP1, KES1::Nat                  |
| A36920         | -   | MATalpha, ade2-1, leu2-3, ura3, trp1-1, his3-11,15, can1-100, GAL, psi+, pl-1                                                                                                                       |
| A36921         | -   | MATa, ade2-1, leu2-3, ura3, trp1-1, his3-11,15, can1-100, GAL, psi+, pl-2                                                                                                                           |
| A36922         | -   | MATalpha, ade2-1, leu2-3, ura3, trp1-1, his3-11,15, can1-100, GAL, psi+, pl-1 + pl-2                                                                                                                |
| A36923         | -   | MATa, ade2-1, leu2-3, ura3, trp1-1, his3-11,15, can1-100, GAL, psi+, pll-1                                                                                                                          |
| A36924         | -   | MATalpha, ade2-1, leu2-3, ura3, trp1-1, his3-11,15, can1-100, GAL, psi+, pll-2                                                                                                                      |
| A36925         | -   | MATa, ade2-1, leu2-3, ura3, trp1-1, his3-11,15, can1-100, GAL, psi+, pll-1 + pll-2                                                                                                                  |
| A36926         | -   | MATalpha, ade2-1, leu2-3, ura3, trp1-1, his3-11,15, can1-100, GAL, psi+, piv-1                                                                                                                      |

|        |   |                                                                                            |
|--------|---|--------------------------------------------------------------------------------------------|
| A36927 | - | MATalpha, ade2-1, leu2-3, ura3, trp1-1, his3-11,15, can1-100, GAL, psi+, pV-1              |
| A36928 | - | MATalpha, ade2-1, leu2-3, ura3, trp1-1, his3-11,15, can1-100, GAL, psi+, pVIII-1           |
| A36929 | - | MATa, ade2-1, leu2-3, ura3, trp1-1, his3-11,15, can1-100, GAL, psi+, pVIII-2               |
| A36930 | - | MATalpha, ade2-1, leu2-3, ura3, trp1-1, his3-11,15, can1-100, GAL, psi+, pVIII-1 + pVIII-2 |
| A36931 | - | MATalpha, ade2-1, leu2-3, ura3, trp1-1, his3-11,15, can1-100, GAL, psi+, pIX-1             |
| A36932 | - | MATalpha, ade2-1, leu2-3, ura3, trp1-1, his3-11,15, can1-100, GAL, psi+, pIX-2             |
| A36933 | - | MATa, ade2-1, leu2-3, ura3, trp1-1, his3-11,15, can1-100, GAL, psi+, pIX-1 + pIX-2         |
| A36934 | - | MATa, ade2-1, leu2-3, ura3, trp1-1, his3-11,15, can1-100, GAL, psi+, pX-1                  |
| A36935 | - | MATalpha, ade2-1, leu2-3, ura3, trp1-1, his3-11,15, can1-100, GAL, psi+, pX-2              |
| A36936 | - | MATa, ade2-1, leu2-3, ura3, trp1-1, his3-11,15, can1-100, GAL, psi+, pX-1 + pX-2           |
| A36937 | - | MATalpha, ade2-1, leu2-3, ura3, trp1-1, his3-11,15, can1-100, GAL, psi+, pXI-1             |
| A36938 | - | MATa, ade2-1, leu2-3, ura3, trp1-1, his3-11,15, can1-100, GAL, psi+, pXI-2                 |
| A36939 | - | MATa, ade2-1, leu2-3, ura3, trp1-1, his3-11,15, can1-100, GAL, psi+, pXI-1 + pXI-2         |
| A36940 | - | MATalpha, ade2-1, leu2-3, ura3, trp1-1, his3-11,15, can1-100, GAL, psi+, pXIV-1            |
| A36941 | - | MATa, ade2-1, leu2-3, ura3, trp1-1, his3-11,15, can1-100, GAL, psi+, pXIV-2                |
| A36942 | - | MATa, ade2-1, leu2-3, ura3, trp1-1, his3-11,15, can1-100, GAL, psi+, pXIV-1+ pXIV-2        |
| A36943 | - | MATalpha, ade2-1, leu2-3, ura3, trp1-1, his3-11,15, can1-100, GAL, psi+, pXV-1             |
| A36944 | - | MATa, ade2-1, leu2-3, ura3, trp1-1, his3-11,15, can1-100, GAL, psi+, pXVI-1                |
| A36945 | - | MATalpha, ade2-1, leu2-3, ura3, trp1-1, his3-11,15, can1-100, GAL, psi+, pXVI-2            |
| A36946 | - | MATa, ade2-1, leu2-3, ura3, trp1-1, his3-11,15, can1-100, GAL, psi+, pXVI-3                |
| A36947 | - | MATa, ade2-1, leu2-3, ura3, trp1-1, his3-11,15, can1-100, GAL, psi+, pXVI-1 + pXVI-2       |
| A36948 | - | MATa, ade2-1, leu2-3, ura3, trp1-1, his3-11,15, can1-100,                                  |

|        |   |                                                                                            |
|--------|---|--------------------------------------------------------------------------------------------|
|        |   | GAL, psi+, pXVI-1 + pXVI-3                                                                 |
| A36949 | - | MATa, ade2-1, leu2-3, ura3, trp1-1, his3-11,15, can1-100, GAL, psi+, pXVI-2 + pXVI-3       |
| A36950 | - | MATa, ade2-1, leu2-3, ura3, trp1-1, his3-11,15, can1-100, GAL, psi+, EP1                   |
| A36951 | - | MATa, ade2-1, leu2-3, ura3, trp1-1, his3-11,15, can1-100, GAL, psi+, EP2                   |
| A36952 | - | MATa, ade2-1, leu2-3, ura3, trp1-1, his3-11,15, can1-100, GAL, psi+, EP3                   |
| A36953 | - | MATalpha, ade2-1, leu2-3, ura3, trp1-1, his3-11,15, can1-100, GAL, psi+, EP1 + EP2         |
| A36954 | - | MATa, ade2-1, leu2-3, ura3, trp1-1, his3-11,15, can1-100, GAL, psi+, EP1 + EP3             |
| A36955 | - | MATa, ade2-1, leu2-3, ura3, trp1-1, his3-11,15, can1-100, GAL, psi+, EP2 + EP2             |
| A36956 | - | MATa, ade2-1, leu2-3, ura3, trp1-1, his3-11,15, can1-100, GAL, psi+, EP1 + EP2 + EP3       |
| A36957 | - | MATa, ade2-1, leu2-3, ura3, trp1-1, his3-11,15, can1-100, GAL, psi+, pII-3                 |
| A36958 | - | MATalpha, ade2-1, leu2-3, ura3, trp1-1, his3-11,15, can1-100, GAL, psi+, pX-2 + pVIII-2    |
| A36959 | - | MATa, ade2-1, leu2-3, ura3, trp1-1, his3-11,15, can1-100, GAL, psi+, pX-2 + pI-2           |
| A36960 | - | MATa, ade2-1, leu2-3, ura3, trp1-1, his3-11,15, can1-100, GAL, psi+, pX-2 + pI-2 + pVIII-2 |
| A36961 | - | MATa, ade2-1, leu2-3, ura3, trp1-1, his3-11,15, can1-100, GAL, psi+, pI-1 + pI-2 + pII-3   |
| A36983 | - | MATalpha, ade2-1, leu2-3, ura3, trp1-1, his3-11,15, can1-100, GAL, psi+, pACT1             |
